# Supplementary material for: Direct In Vivo Activation of T Cells with Nanosized Immunofilaments Inhibits Tumor Growth and Metastasis
Source: PubMed Central journal article supplement (PMC10339791; doi:10.1021/acsnano.2c11884), 2023-06-20
Supplement: nn2c11884_si_002.pdf [file nn2c11884_si_002.pdf]

Supporting Information

# Direct in vivo activation of T Cells with Nanosized Immunofilaments inhibits tumor growth and metastasis

*Lea Weiss<sup>1,2,3</sup>, Jorieke Weiden<sup>1,2,3</sup>\*, Yusuf Dölen<sup>1,2</sup>, Emilia M. Grad<sup>1,2</sup>, Eric A.W. van Dinther<sup>1,2</sup>, Marjolein Schluck<sup>1,2,3</sup>, Loek J. Eggermont<sup>1,2</sup>, Guido van Mierlo<sup>4</sup>, Uzi Gileadi<sup>5</sup>, Ariadna Bartoló-Ibars<sup>6</sup>, René Raavé<sup>7</sup>, Mark A.J. Gorris<sup>1,2</sup>, Lisa Maassen<sup>1</sup>, Kiek Verrijp<sup>1,2</sup>, Michael Valente<sup>1,2</sup>, Bart Deplancke<sup>4</sup>, Martijn Verdoes<sup>1,3</sup>, Daniel Benitez-Ribas<sup>6</sup>, Sandra Heskamp<sup>7</sup>, Annemiek B. van Spriel<sup>1,3</sup>, Carl G. Figdor<sup>1,2,3</sup>\* and Roel Hammink<sup>1,2</sup>\**

1. Department of Tumor Immunology, Radboud Institute for Molecular Life Sciences, Radboud University Medical Center, Geert Grooteplein 26, 6525 GA, Nijmegen, the Netherlands

2. Division of Immunotherapy, Oncode Institute, Radboud University Medical Center, 6525 GA, Nijmegen, the Netherlands

3. Institute for Chemical Immunology, 6525 GA, Nijmegen, the Netherlands

4. Laboratory of Systems Biology and Genetics, Institute of Bioengineering, School of Life Sciences, Swiss Federal Institute of Technology (EPFL), 1015 CH, Lausanne, Switzerland

5. MRC Human Immunology Unit, Weatherall Institute of Molecular Medicine, University of Oxford, OX3 9DS, Oxford, United Kingdom

6. Department of Immunology, Hospital Clinic, August Pi I Sunyer Biomedical Research Institute (IDIBAPS), University of Barcelona, Carrer Villarroel 170, 08036, Barcelona, Spain

7. Department of Radiology and Nuclear Medicine, Radboud University Medical Center, Geert Grooteplein-Zuid 10, 6525 HP, Nijmegen, The Netherlands

\* Corresponding authors:

[joriekeweiden@live.nl](mailto:joriekeweiden@live.nl), [carl.figdor@radboudumc.nl](mailto:carl.figdor@radboudumc.nl), [roel.hammink@radboudumc.nl](mailto:roel.hammink@radboudumc.nl)

**Figure S1.** Polymer characterization.

**Figure S2.** Multivalent immunofilaments presenting pMHC<sup>(SIIN)</sup> support OT-I T cell activation, proliferation and target cell killing.

**Figure S3.** Multivalent immunofilaments presenting pMHC<sup>(SIIN)</sup> support OT-I T cell granzyme production, proliferation and an effector memory phenotype

**Figure S4.** Immunofilaments presenting pMHC<sup>(SIIT)</sup> and in particular IF-pMHC<sup>(SIIT)</sup>/IL-2 support OT-I T cell viability and proliferation

**Figure S5.** Characterization of OT-I and comparison of differential genes of OT-I T cells after 22 hours stimulation with DCs and IF-pMHC<sup>(SIIN)</sup>/IL-2.

**Figure S6.** Immunofilaments presenting A2<sup>(NY-ESO-V)</sup>/IL-2 stimulate TCR-transfected human HLA-A2.1<sup>+</sup> CD8<sup>+</sup> T cells in a specific manner.

**Figure S7.** Impact of single versus co-presentation of ProL,  $\alpha$ CD28 and IL-2 on IFs for CD19 CAR T cell activation.

**Figure S8.** In vivo cellular uptake of the In<sup>111</sup>-labelled IF or IF-pMHC<sup>(SIIN)</sup>.

**Figure S9.** The in vivo biodistribution and T cell activation of IF-pMHC<sup>(SIIN)</sup> in WT mice adoptively transferred with WT CD8<sup>+</sup> T cells or OT-I CD8<sup>+</sup> T cells.

**Figure S10.** Immunofilaments presenting pMHC<sup>(SIIN)</sup> expand antigen-specific OT-I T cells in vivo.

**Figure S11.** Immunofilaments presenting A2<sup>(NY-ESO-V)</sup> expand antigen-specific 1G4 T cells adoptively transferred into recipient mice in vivo.

**Figure S12.** Number of lung metastasis and mouse weight in the iv B16-OVA model treated with pre-activated OT-I CD8<sup>+</sup> T cells.

**Figure S13.** Tumor growth and CD8<sup>+</sup> T cell infiltration in sc B16-OVA tumors.

**Figure S14.** Representative example of image analysis approach of T cell infiltration into B16-OVA tumors.

**Table S1.** Normalized counts by RNAseq for all detected genes and of significantly different genes between DCs and IF-pMHC<sup>(SIIT)</sup>/IL-2 after 8 hours and 22 hours stimulation of OT-I T cells.

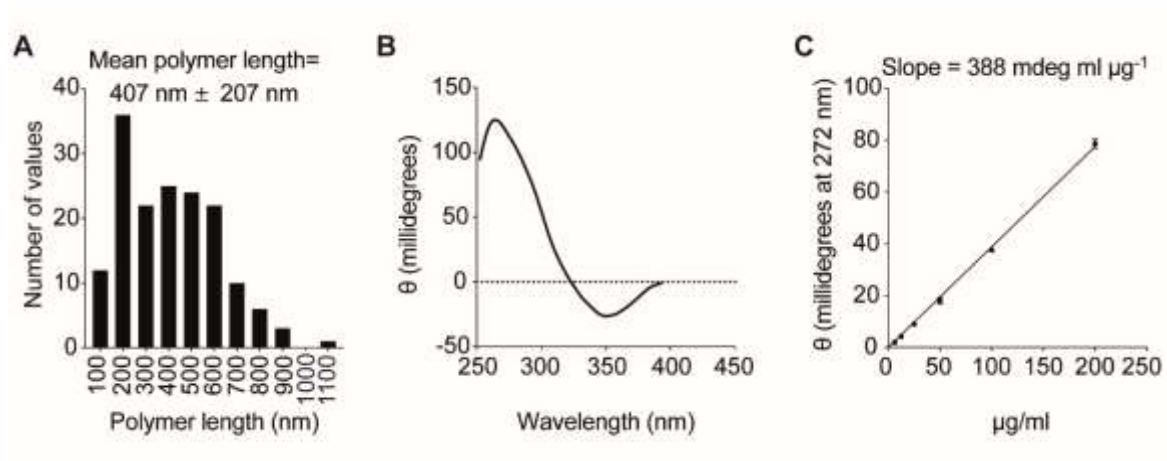

**Figure S1. Polymer characterization.** A) Histogram of polymer length analysis using atomic force microscopy, showing the length distribution. B) Circular Dichroism (CD)-spectrum of the polymer backbone. C) Standard curve of CD signal versus polymer concentration used to calculate polymer concentrations in the IF samples.

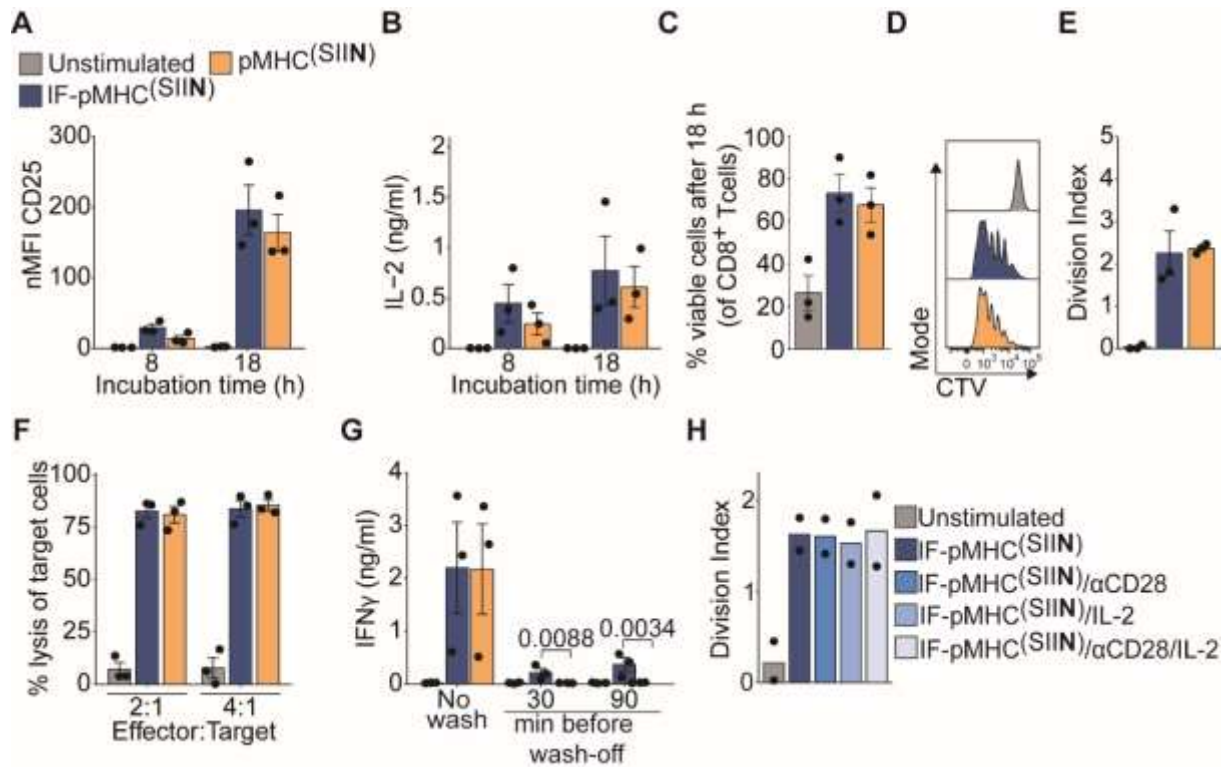

**Figure S2. Multivalent immunofilaments presenting pMHC<sup>(SIIN)</sup> support OT-I T cell activation, proliferation and target cell killing.** (A) Flow cytometry quantification of the normalized geometric mean fluorescence intensity (nMFI) of activation marker CD25 after 8 hours or 18 hours. Statistical significance was determined by two-way ANOVA on log-transformed data with post-hoc Sidak's multiple comparison test. (B) IL-2 production by OT-I T cells after 8 hours and 18 hours, determined by ELISA. Statistical significance was tested by two-way ANOVA on log-transformed data. (C) Percentage of viable cells (eFluor 780<sup>-</sup> cells) after 18 hours stimulation of CD8<sup>+</sup> T cells. (D,E) Proliferation by CTV dilution (D) and quantification of division index (E) of non-stimulated OT-I T cells or stimulated for 3 days with IF-pMHC<sup>(SIIN)</sup> or pMHC<sup>(SIIN)</sup>. Statistical significance was tested with unpaired t-test. (F) Flow cytometry quantification of the percentage of lysed B16-OVA melanoma target cells 24 hours after co-incubation with OT-I T cells pre-stimulated for 20 hours. Statistical significance was tested with two-way ANOVA on log-transformed data. (G) IFN $\gamma$  production by OT-I T cells after two days by ELISA, either without washing away the stimulation (left) or after washing the cells either 30 min or 90 min after addition of IF-pMHC<sup>(SIIN)</sup> or pMHC<sup>(SIIN)</sup>. Statistical significance was tested with two-way ANOVA on log-transformed data and post-hoc Sidak's multiple comparison test. (A-G)  $n = 3$  in three independent experiments. p-values are indicated in the

Figure. (H) Flow cytometry quantification of the division index of OT-I T cells stimulated for 3 days comparing various IF-pMHC<sup>(SIIIN)</sup>. The two experiments were performed with the same IFs more than one year apart from each other (Oct 2019 and Jan 2021), demonstrating the stability of the IFs when stored at -20 °C.  $n = 2$  in two independent experiments

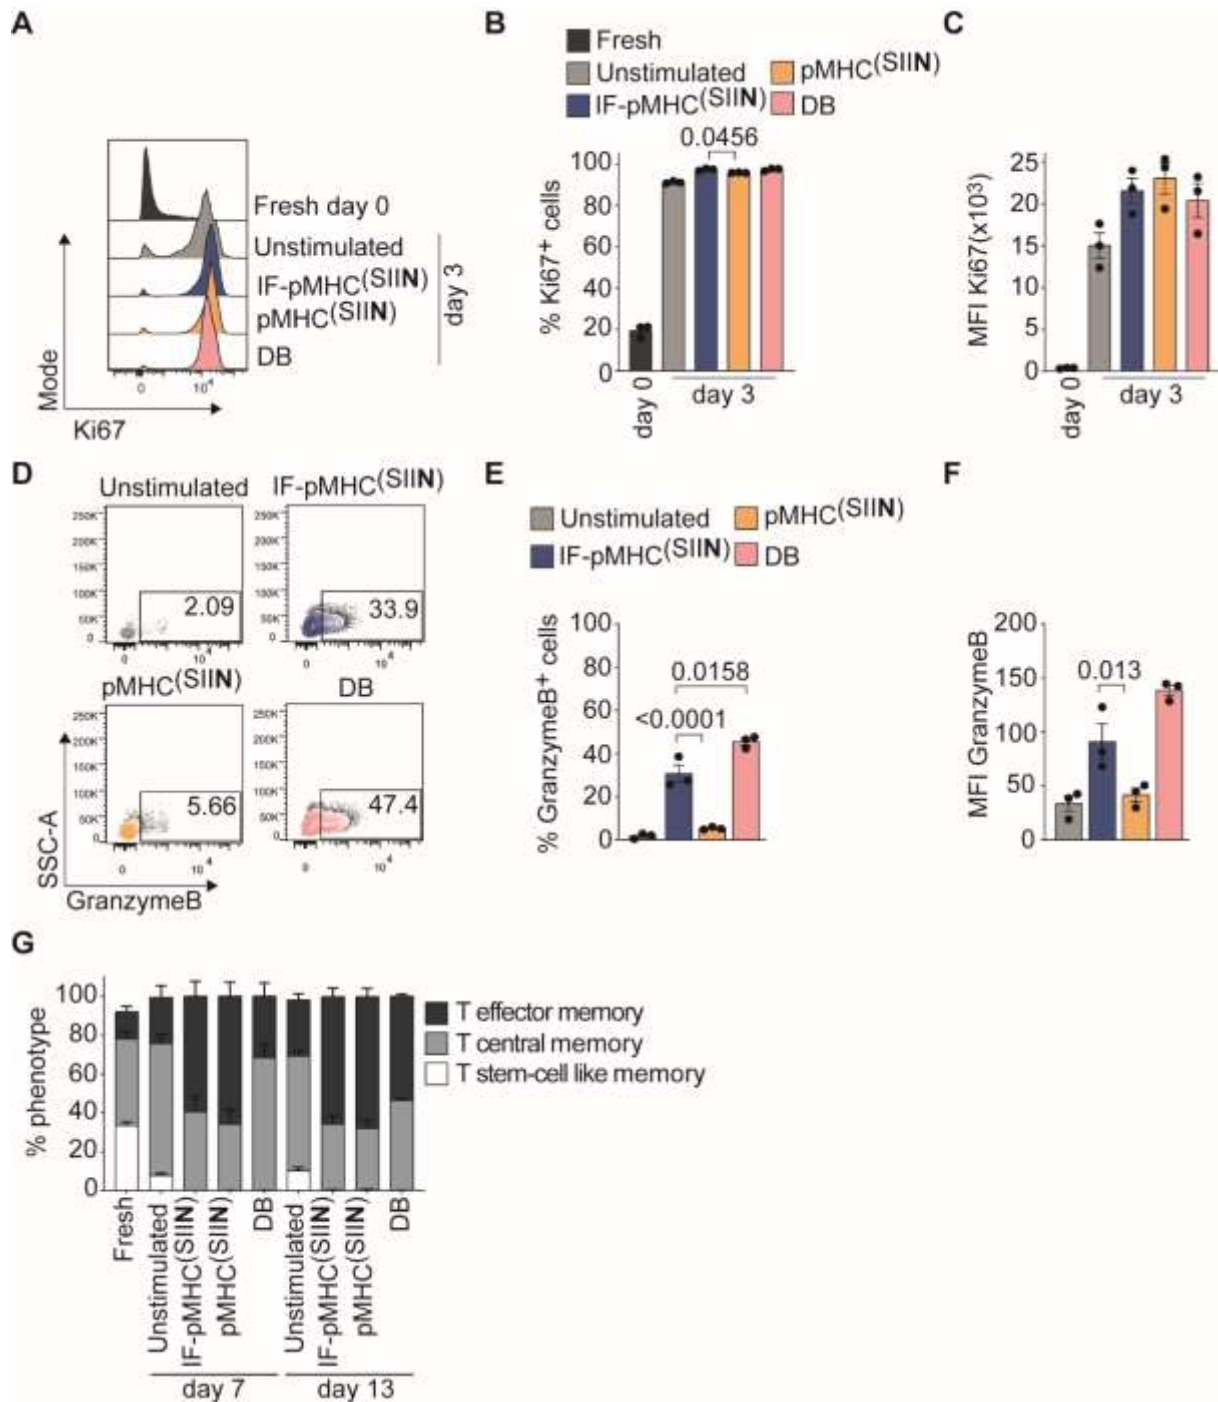

**Figure S3. Multivalent immunofilaments presenting pMHC<sup>(SIIN)</sup> support OT-I T cell granzyme production, proliferation and an effector phenotype.** (A-C) Representative histograms on day 0 or 3 of Ki67 expression (A), quantification of Ki67 positive cells (B) and geometric mean fluorescence intensity (MFI) (C) of Ki67 of unstimulated cells or cells treated with IF-pMHC<sup>(SIIN)</sup>, pMHC<sup>(SIIN)</sup> or Dynabeads (DB). Cells were cultured in 300 IU/ml recombinant human Interleukin-2. Statistical significance was tested with one-way ANOVA on



logit-transformed (B-C) or log-transformed data with post-hoc Dunnett's multiple comparison test. (D-F) Representative flow cytometry plots of granzyme B production (D), quantification of granzyme B positive cells (E) and geometric mean fluorescence intensity (MFI) of granzyme B (F) of unstimulated cells or cells stimulated with IF-pMHC<sup>(SIIN)</sup>, pMHC<sup>(SIIN)</sup> or Dynabeads (DB) after 16 hours following 5.5 hours of degranulation-block. Statistical significance was determined by one-way ANOVA on logit-transformed (E) log-transformed (F) data with post-hoc Dunnett's multiple comparison test. (G) Percentage of unstimulated cells or cells stimulated with IF-pMHC<sup>(SIIN)</sup>, pMHC<sup>(SIIN)</sup> or Dynabeads (DB) representing a T effector memory, T central memory or T stem-cell like memory phenotype after 7 and 13 days. For reference, the phenotype of freshly isolated cells is depicted as well. (A-G)  $n = 3$  in three independent experiments. p-values are indicated in the Figure.

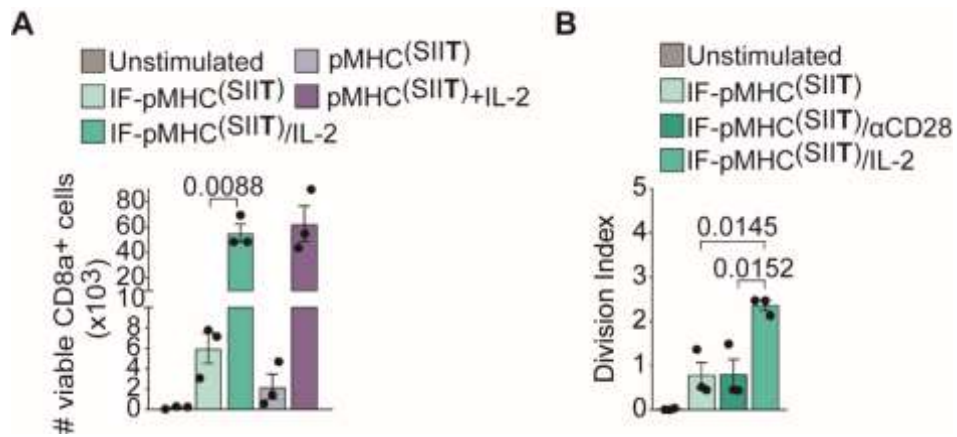

**Figure S4. Immunofilaments presenting pMHC<sup>(SIIT)</sup> and in particular IF-pMHC<sup>(SIIT)</sup>/IL-2 support OT-I T cell viability and proliferation.** (A) Quantification of the number of viable cells by flow cytometry after 3 days of stimulation with various IF-pMHC<sup>(SIIT)</sup>. Statistical significance was determined by one-way ANOVA and post-hoc Tukey's multiple comparison test. (B) Flow cytometry quantification of the division index of OT-I T cells stimulated for three days comparing various IF-pMHC<sup>(SIIT)</sup>. Statistical significance was determined by one-way ANOVA and post-hoc Tukey's multiple comparison test. (A-B)  $n = 3$  in three independent experiments. p-values are indicated in the Figure.

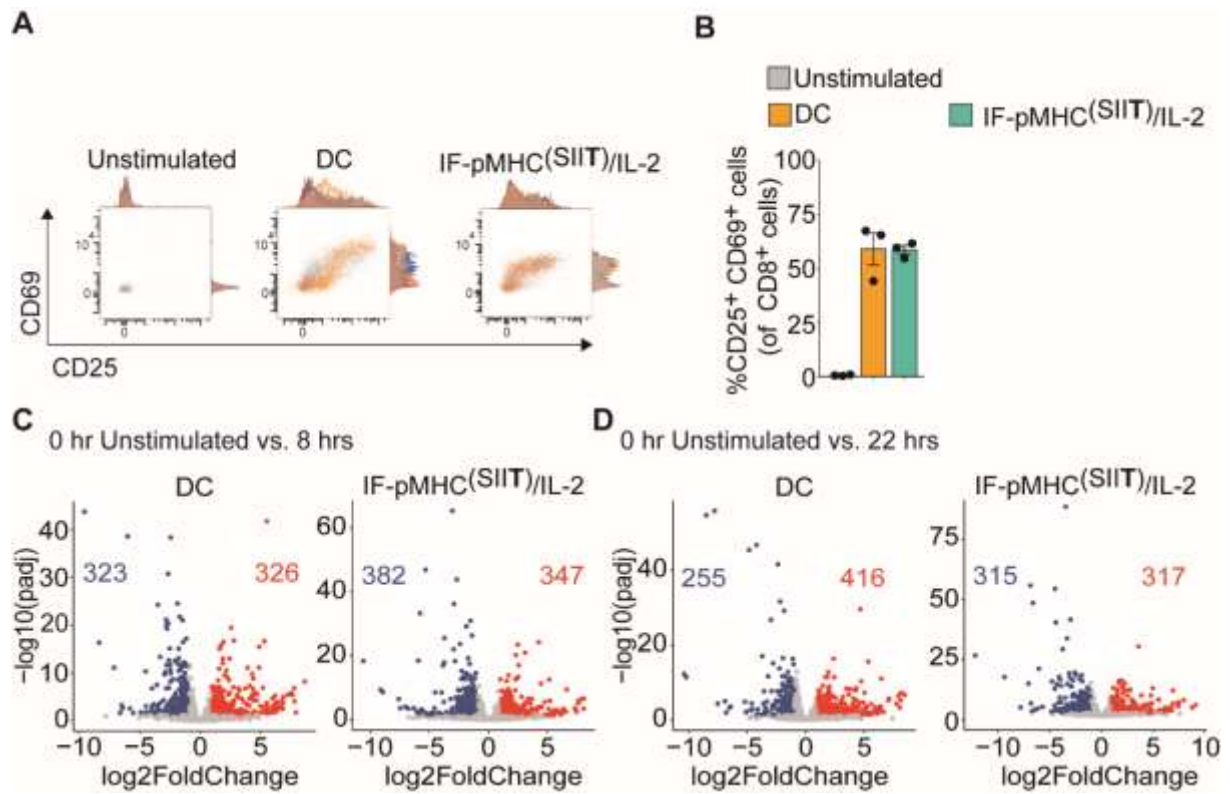

**Figure S5. Characterization of OT-I and comparison of differential genes of OT-I T cells after 22 hours stimulation with DCs and IF-pMHC<sup>(SIIT)</sup>/IL-2.** (A-B) Representative flow cytometry plots (orange, red and blue represent the three donors) (A) and quantification (B) of the % of CD25<sup>+</sup>/CD69<sup>+</sup> OT-I T cells before and after 22 hours stimulation with Flt3 ligands DCs and pMHC<sup>(SIIT)</sup>/IL-2. (C-D) Volcano plots depicting differential genes comparing OT-I T cells stimulated by DCs or IF-pMHC<sup>(SIIT)</sup>/IL-2 at 0 hours vs 8 hours (C) and at 0 hours vs 22 hours (D). Genes with corrected  $p < 0.05$  are highlighted in blue/red.

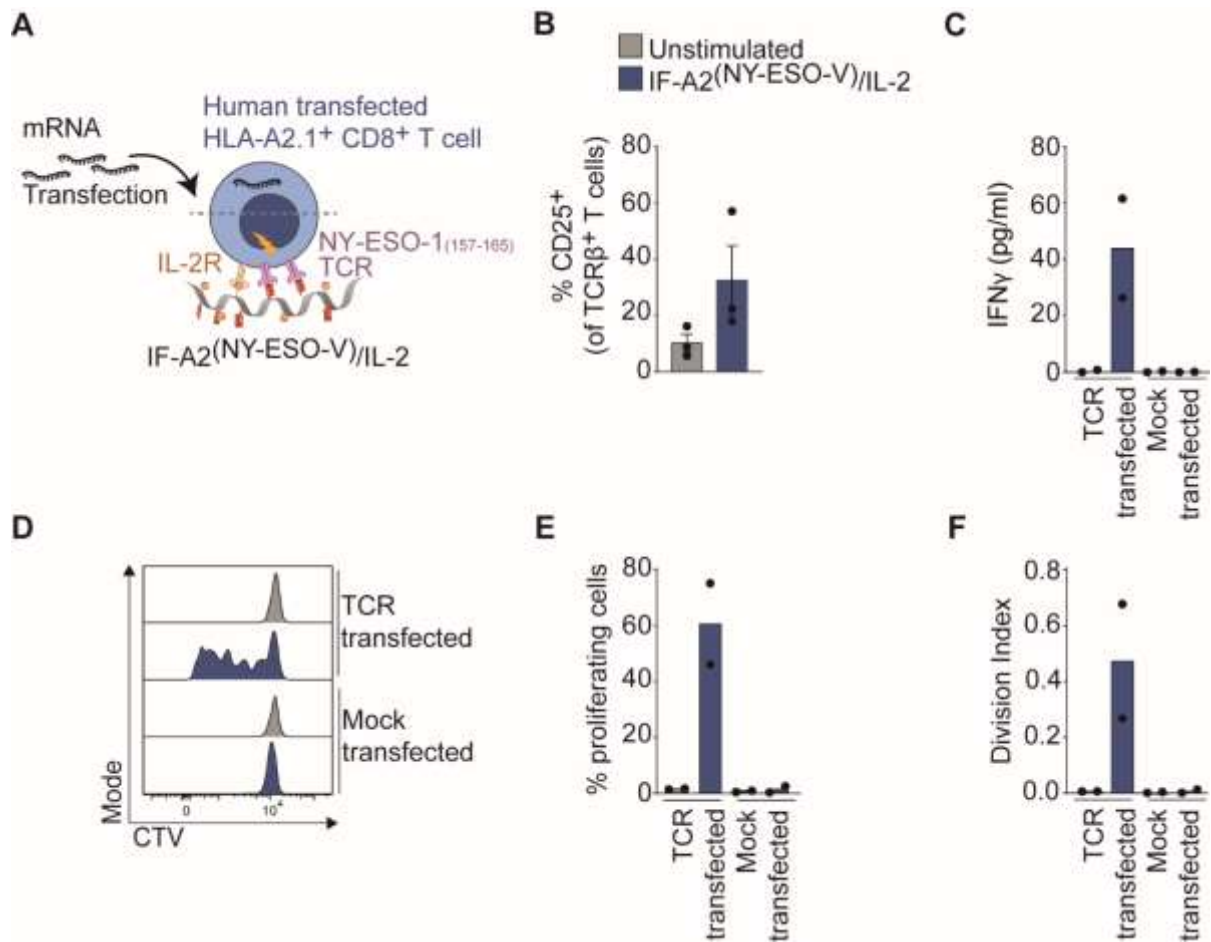

**Figure S6. Immunofilaments presenting A2<sup>(NY-ESO-V)</sup>/IL-2 stimulate TCR-transfected human HLA-A2.1<sup>+</sup> CD8<sup>+</sup> T cells in a specific manner.** (A) Schematic overview of stimulation of human HLA-A2.1<sup>+</sup> CD8<sup>+</sup> T cells transfected with TCR specific for NY-ESO-1<sub>(157-165)</sub> with IF-A2<sup>(NY-ESO-V)</sup>/IL-2. (B) Flow cytometry quantification of the percentage of activated CD25<sup>+</sup> T cells of all CD8<sup>+</sup> transfected T cells after 24 hours. (C) IFN $\gamma$  production after 3 days of incubation with IF.  $n = 3$  in three independent experiments. (D-F) Proliferation by CTV dilution (D) and quantification of the percentage of proliferating cells (E) and division index (F) TCR-transfected or mock-transfected T cells left non-stimulated or stimulated for 4 days with IF-A2<sup>(NY-ESO-V)</sup>/IL-2. (C, E, F)  $n = 2$  in two independent experiments.

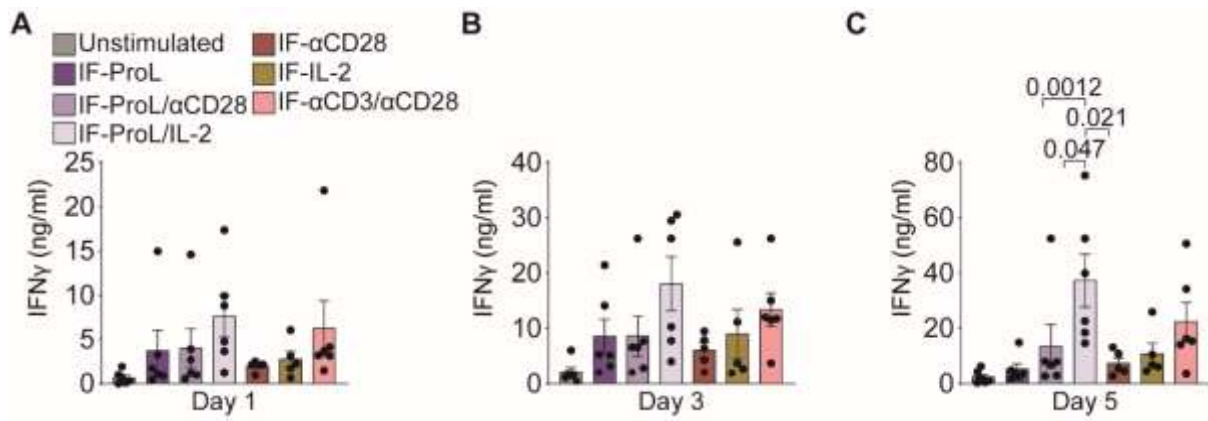

**Figure S7. Impact of single versus co-presentation of ProL,  $\alpha$ CD28 and IL-2 on IFs for CD19 CAR T cell activation.** (A-C) IFN $\gamma$  production after 1 (A) , 3 (B) and 5 days (C) incubation with IF. Statistical significance was determined by two-way ANOVA on log-transformed data with post-hoc Tukey's multiple comparison test.  $n = 5 - 6$  in five to six independent experiments. p-values are indicated in the Figure.

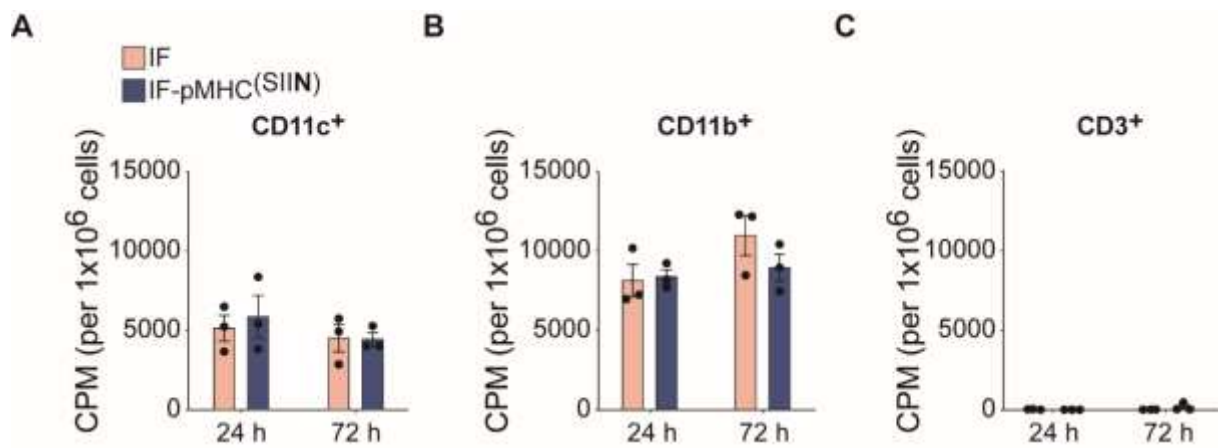

**Figure S8. In vivo cellular uptake of the  $^{111}\text{In}$ -labelled IF or IF-pMHC(SIIN) in the spleen.**

(A-C) Quantification of counts per minute (CPM) per  $1 \times 10^6$  cells selected for CD11b<sup>+</sup> (A), CD11c<sup>+</sup> (B) or CD3<sup>+</sup> (C) after 24 hours (h) or 72 hours following injection of  $^{111}\text{In}$ -labelled IF or  $^{111}\text{In}$ -labelled IF-pMHC(SIIN). Statistical significance was tested by two-way ANOVA.

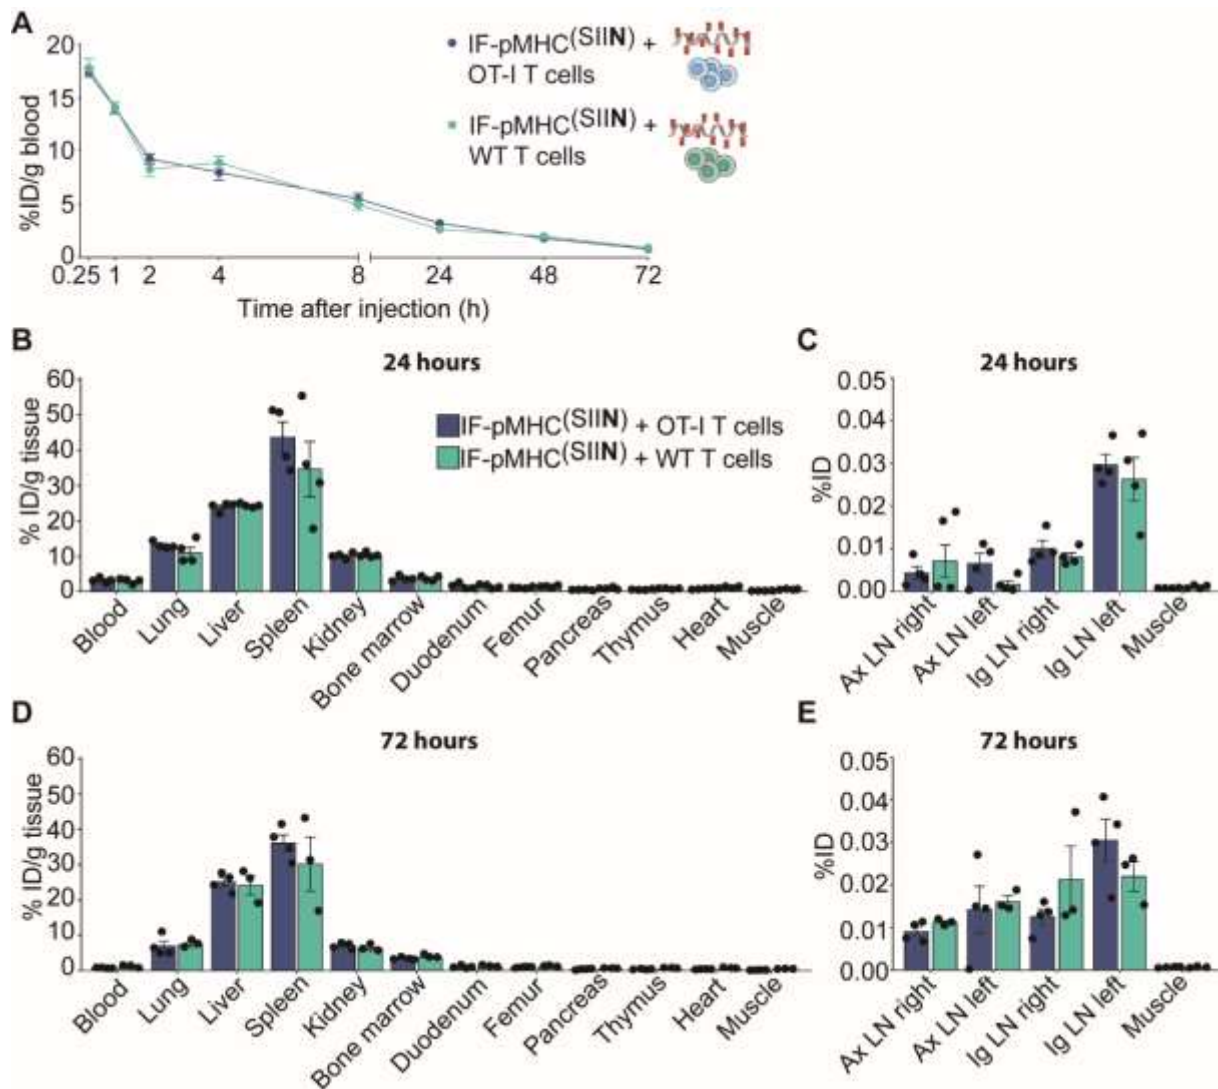

**Figure S9. The in vivo biodistribution and T cell activation of IF-pMHC<sup>(SIIN)</sup> in WT mice adoptively transferred with WT CD8<sup>+</sup> T cells or OT-I CD8<sup>+</sup> T cells.** (A) Kinetics of <sup>111</sup>In-labelled IF-pMHC<sup>(SIIN)</sup> in blood after iv injection in WT CD45.1<sup>+</sup> C57Bl/6J mice, expressed at % of injected dose (ID) per gram of blood. Mice received CD45.2<sup>+</sup> wildtype T cells or CD45.2<sup>+</sup> OT-I T cells one day prior to IFs administration. Statistical significance was determined with mixed effect analysis and post-hoc Sidak's multiple comparison test.  $n = 5$  for  $t=0.25, 1, 2, 4, 8, 24, 48$  and 72 hours in one experiment. (B-E) Quantitative ex vivo analysis of the biodistribution of IF-pMHC<sup>(SIIN)</sup> 24 hours (B-C) and 72 hours (D-E) after iv injection across different organs expressed at % of ID per gram of tissue. Statistical significance was determined per timepoint by two-way ANOVA on log-transformed data with post-hoc Sidak's multiple comparison test.



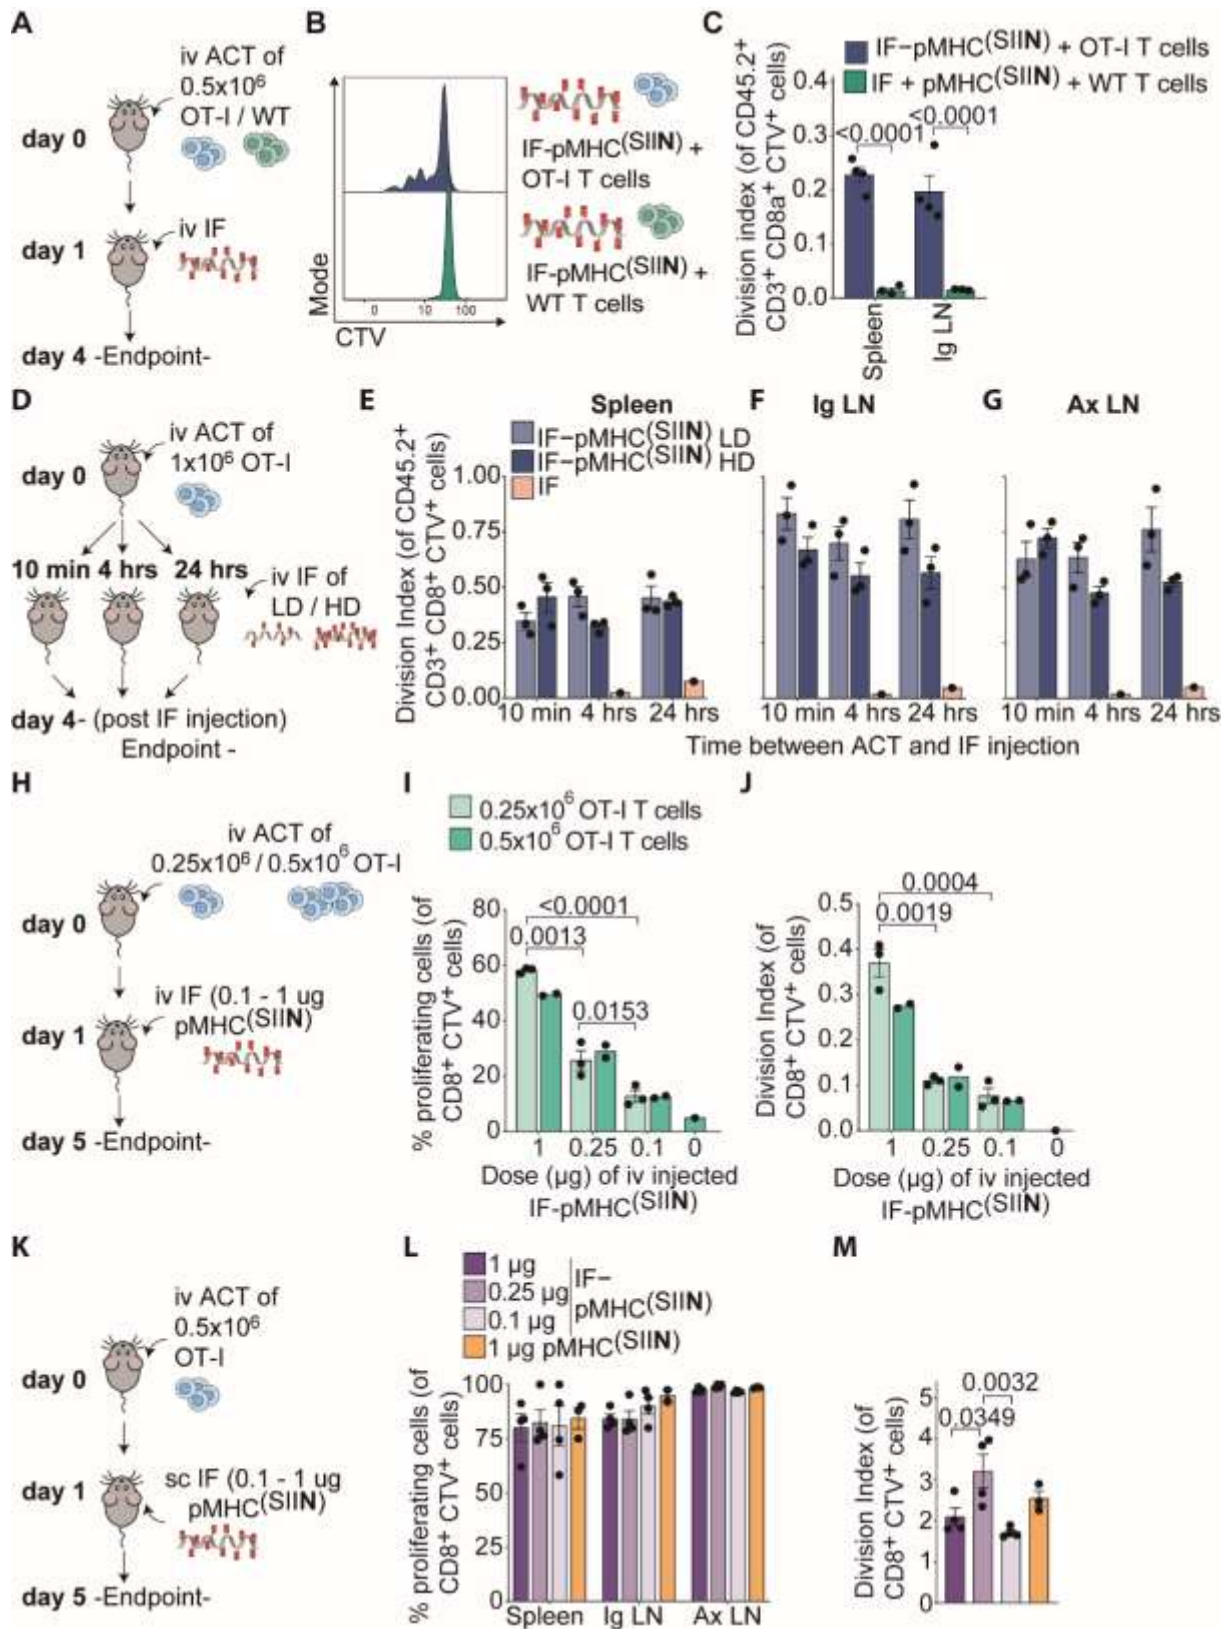

**Figure S10. Immunofilaments presenting pMHC(SIIN) expand antigen-specific OT-I T cells in vivo.** (A) Schematic overview of experiment to determine in vivo OT-I T cell proliferation after iv administration of IF-pMHC(SIIN) or IFs + free pMHC(SIIN). (B-C) Ex vivo flow cytometric analysis of



CTV dilution (B) and quantification (C) of the division index of OT-I T cell in the spleen 3 days after iv administration of IF-pMHC<sup>(SIIN)</sup> (0.29 µg pMHC<sup>(SIIN)</sup>) in WT C57Bl/6J adoptively transferred with 0.5x10<sup>6</sup> CTV-labelled OT-I T cells or WT T cells. Significance was determined on log-transformed data with two-way ANOVA and post-hoc Dunnet's multiple comparison test. *n* = 3 in one independent experiment. p-values are indicated in the Figure. (D) Schematic overview of experiment to study the effect of time of administration of IFs following OT-I adoptive transfer. (E,F) Quantification of the division index of OT-I T cells in the spleen (E), in the inguinal (Ig) LN and the axillary (Ax) LN (F) after iv administration of IFs alone of IF-pMHC<sup>(SIIN)</sup> with a low density (LD): ~5 pMHC per IF) or high density (HD): ~16 pMHC per IF). One µg of pMHC<sup>(SIIN)</sup> on IFs were injected either 10 min, 4 hours or 24 hours after adoptive transfer of OT-I T cells. *n* = 3 in one experiment. Significance was tested per organ with two-way ANOVA on log-transformed data with post-hoc Tukey's multiple comparison test. (H) Schematic overview of experiment to study impact of OT-I cell number and IF-pMHC<sup>(SIIN)</sup> dose on OT-I proliferation after iv administration of IF. *n* = 3 for 0.25x10<sup>6</sup> OT-I and *n* = 2 for 0.5x10<sup>6</sup> OT-I in one experiment. (I-J) Quantification of the % of proliferating cells (I) and the division index (J) of OT-I T cells (0.25 or 0.5x10<sup>6</sup>) in the spleen after iv administration of IF-pMHC<sup>(SIIN)</sup> at different doses (dose refers to pMHC<sup>(SIIN)</sup> amount). Significance was determined by one-way ANOVA on logit-transformed (I) or log-transformed (J) data with post-hoc Tukey's multiple comparison test. p-values are indicated in the Figure. *n* = 2 – 3 in one experiment. (K) Schematic overview of experiment to study the impact of IF-pMHC<sup>(SIIN)</sup> dose on OT-I proliferation after sc administration of IF. (L-M) Quantification of the % of proliferating cells (L) in the spleen, Ig LN and Ax LN and the division index (M) in the Ax LN of adoptively transferred OT-I T cells (0.5x10<sup>6</sup>) after sc administration of IF-pMHC<sup>(SIIN)</sup> at different doses or after sc administration of free pMHC<sup>(SIIN)</sup>. Significance was determined with two (L) or one (M) - way ANOVA on logit-transformed (L) or log-transformed (M) data and post-hoc Tukey's multiple comparison test. *n* = 4 in one experiment. p-values are indicated in the Figure.

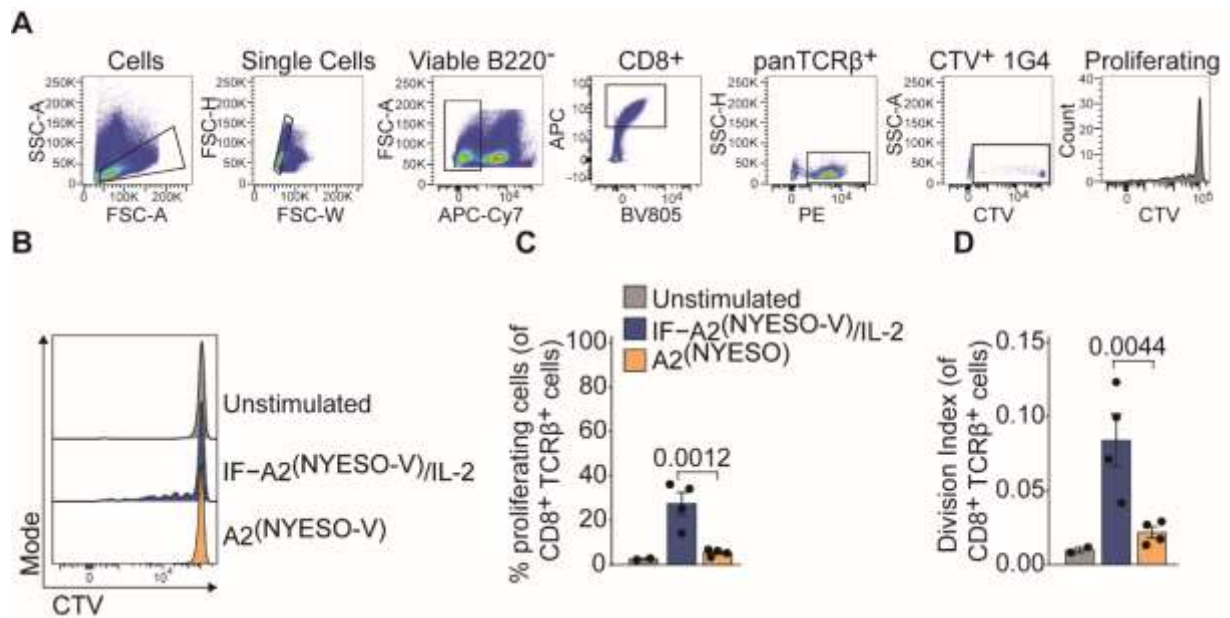

**Figure S11. Immunofilaments presenting A2<sup>(NY-ESO-V)</sup> expand antigen-specific 1G4 T cells adoptively transferred into recipient mice in vivo.** (A) Flow cytometry gating strategy to identify proliferating 1G4 T cells. (B-D) Ex vivo flow cytometric analysis of CTV dilution (B) and quantification of the % of proliferating cells (C) and division index (D) of 1G4 T cells in the spleen 3 days after iv administration of IF-A2<sup>(NY-ESO-V)/IL2</sup> or free A2<sup>(NY-ESO-V)</sup> (1.4 μg A2<sup>(NY-ESO-V)</sup>). Statistical significance was determined by unpaired t-test on logit-transformed (C) or log-transformed (D) data. *n* = 4 in one experiment. *p*-values are indicated in the Figure.

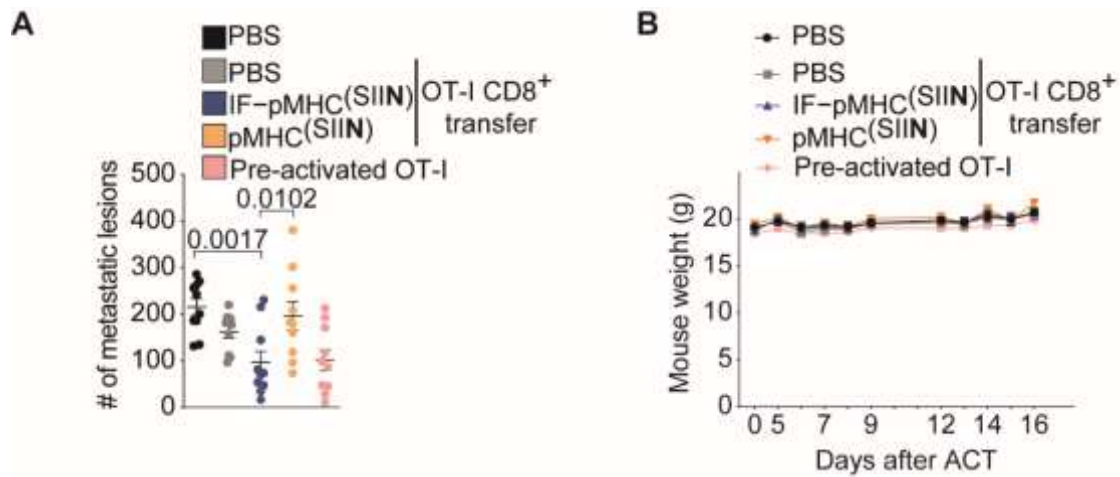

**Figure S12. Number of lung metastasis and mouse weight in the B16-OVA model.**

(A) Enumeration of the total number of metastatic nodules in the lungs. Pre-activated OT-I cells were cultured for 2 days on anti-CD3/anti-CD28 coated wells and then expanded further in 300 IU/ml rh IL-2 for 4 days prior to injection.  $n = 10$  in 2 independent experiments. Statistical significance was determined with one-way ANOVA and post-hoc Dunnet's multiple comparison test. (B) Weight of mice during the experiment.

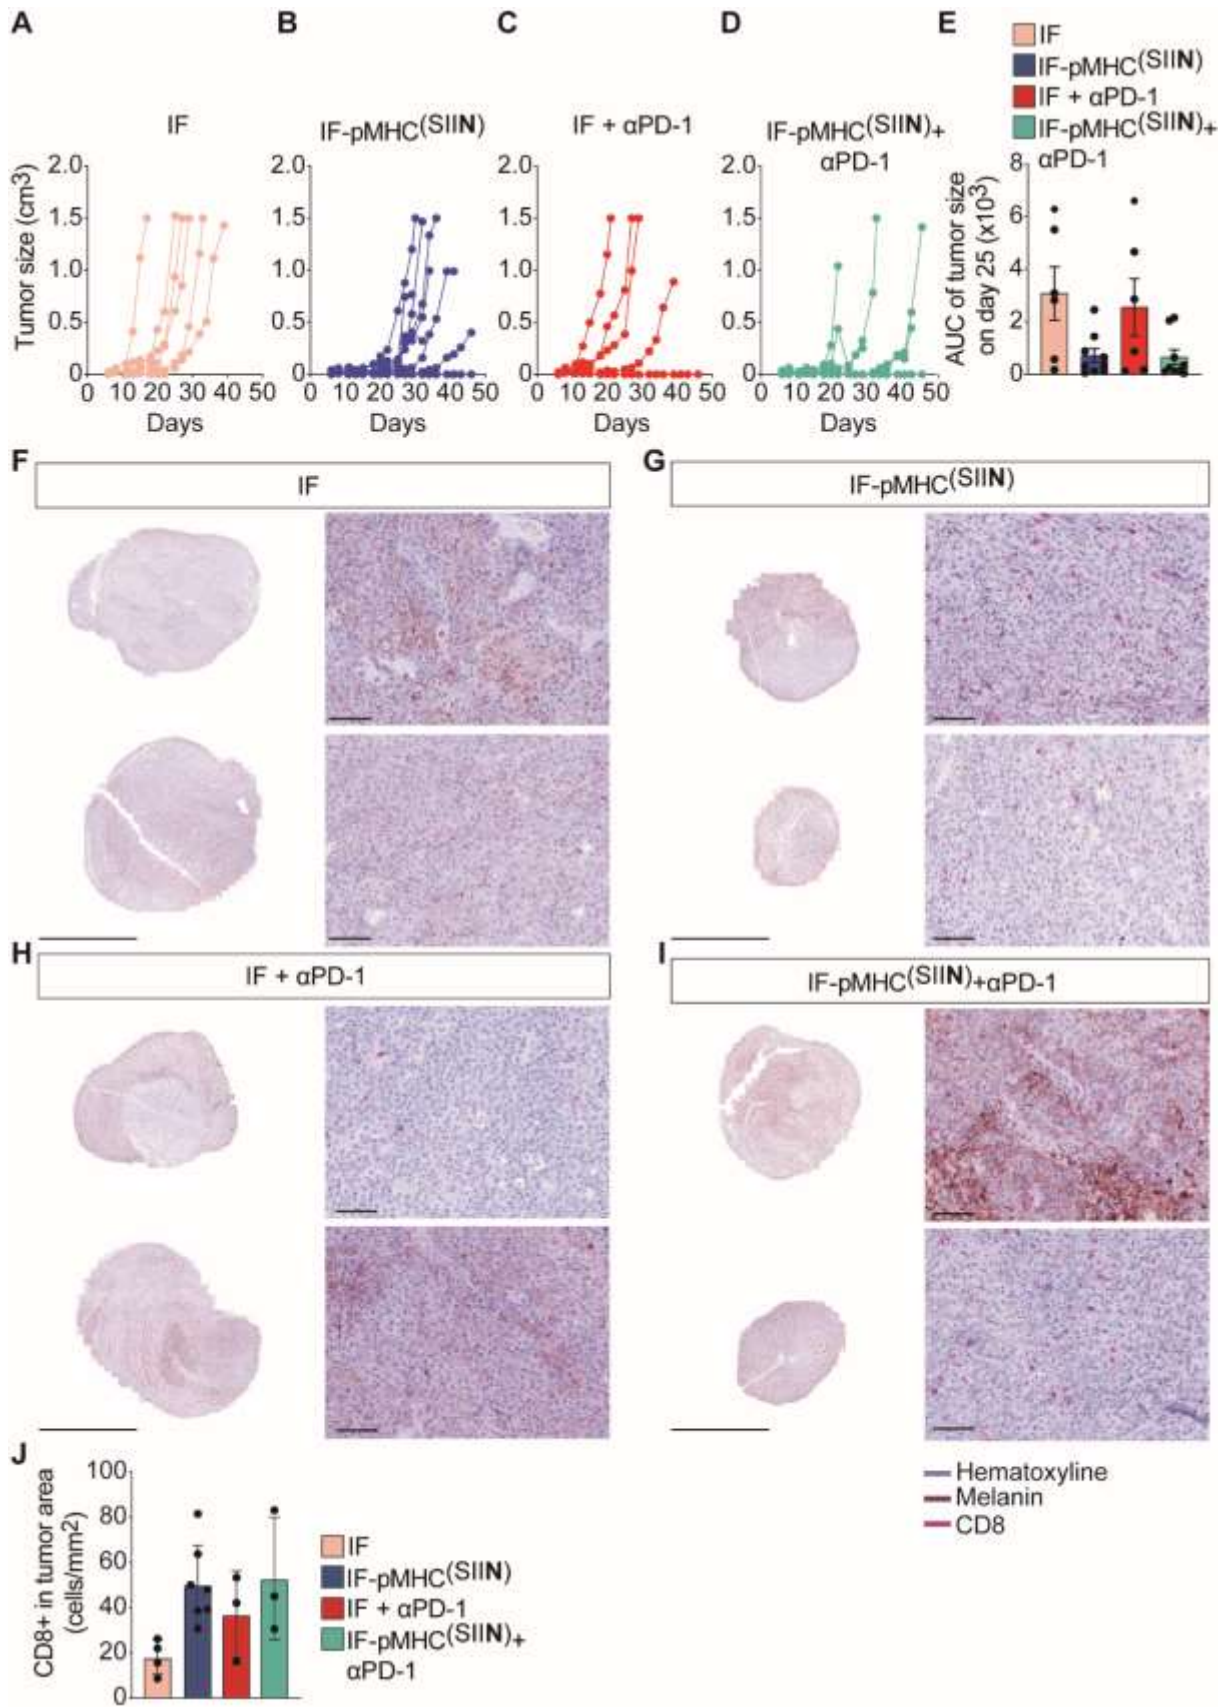

**Figure S13. Tumor growth and CD8<sup>+</sup> T cell infiltration in sc B16-OVA tumors. (A-D)**

Individual curves of quantification of the size of B16-OVA tumors in mice treated sc with non-functionalized IFs (A), IF-pMHC<sup>(SIIIN)</sup> (B), non-functionalized IFs +  $\alpha$ PD-1 (C), and IF-pMHC<sup>(SIIIN)</sup> +  $\alpha$ PD-1 (D).  $n = 6-9$  in one independent experiment. (E) Quantification of the area under the curve (AUC) of the tumors in the sc model on day 25. Statistical significance was tested by Kruskal-Wallis test on log-transformed data. (F-I) Representative sections of B16-OVA tumors harvested on day of sacrifice and stained with H&E and  $\alpha$ CD8 in magenta. Scale bar equals 1 cm for the tumor overview and 100  $\mu$ m for the 20x magnification images. (J) Quantification of the number of CD8<sup>+</sup> infiltrating B16-OVA tumors based on tumor segmentation. One outlier in the IFs group was excluded, as tested by Grubb's outlier test with an  $\alpha = 0.05$ .

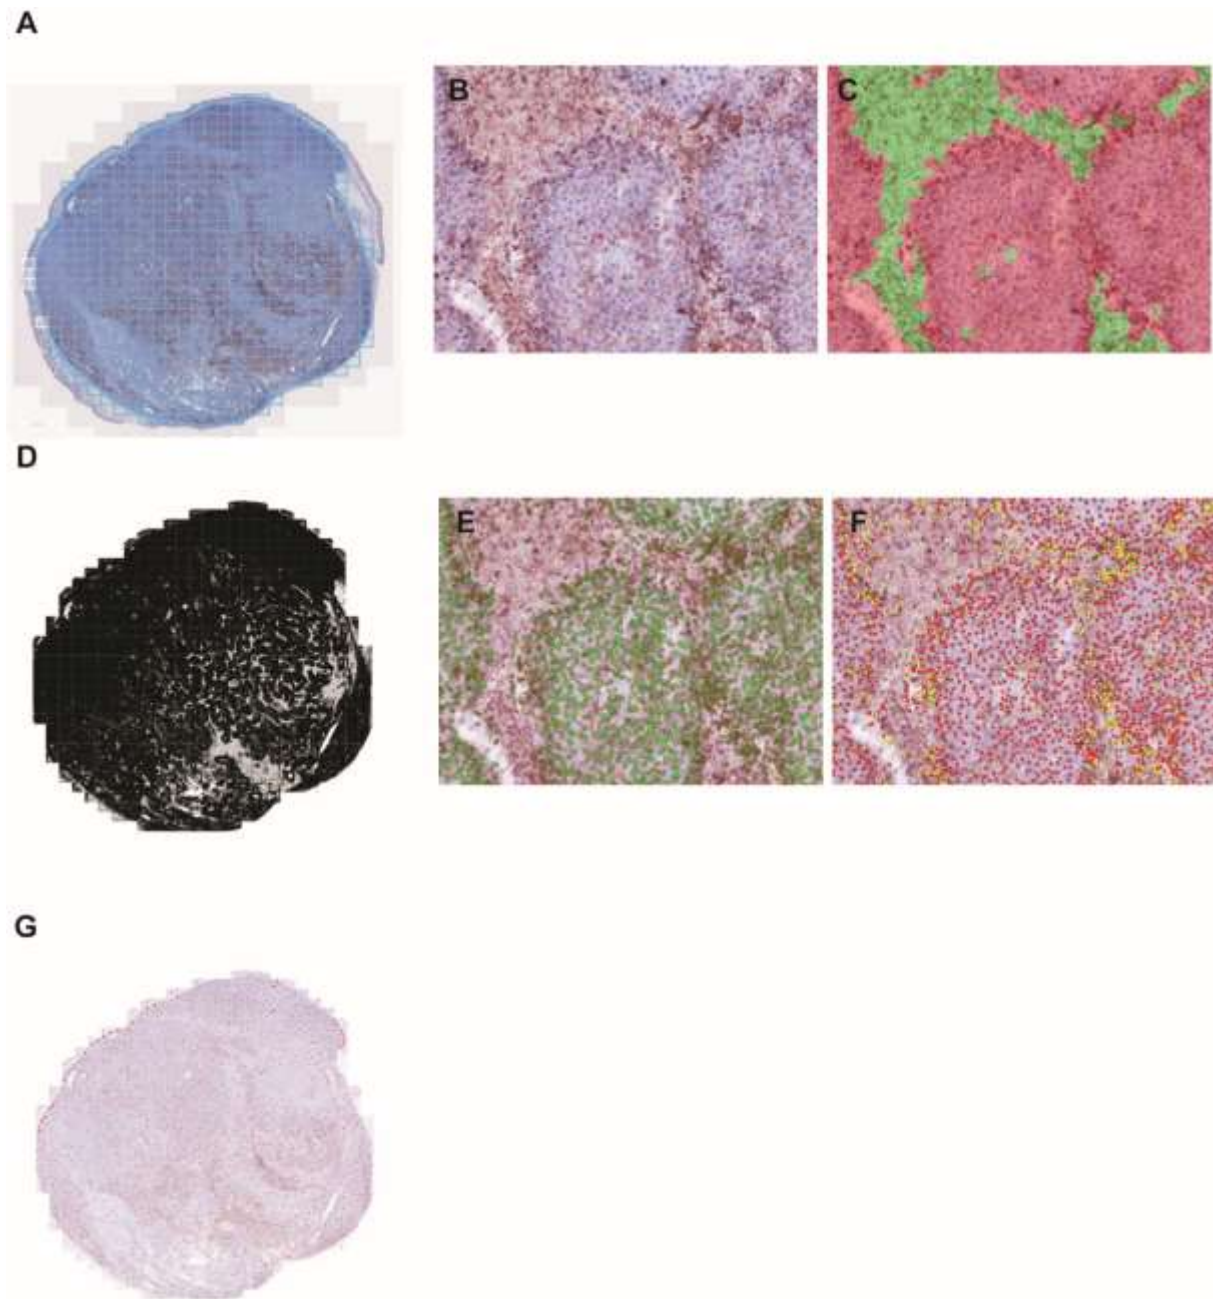

**Figure S14. Representative example of image analysis approach of T cell infiltration into B16-OVA tumors.** (A) B16-OVA tumors stained for CD8 were completely scanned at 20x magnification for multispectral imaging. (B) CD8<sup>+</sup> T cells (magenta), necrotic and pigmented regions (red-brownish) can be observed and could be spectrally unmixed. (C) A tissue segmentation algorithm was trained to separate tumor regions (red) from necrotic areas (green). (D) The tissue segmentation algorithm was applied to all images from all the samples to separate tumor regions (black) from necrotic areas (grey). (E) Cell segmentation was performed on the basis of hematoxylin staining. (F) A phenotyping algorithm was trained to recognize tumor cells (red dots), pigmented cells (yellow dots)

and CD8<sup>+</sup> T cells (green dots). (G) The phenotyping algorithm was applied to all images from all the samples to quantify the density of CD8<sup>+</sup> T cells (red dots) in tumor region.

**Table S1.** Normalized counts by RNAseq for all detected genes and of significantly different genes between DCs and IF-pMHC<sup>(SIT)</sup>/IL-2 after 8 hours and 22 hours stimulation of OT-I T cells. (Separate excel file)
